# Supplementary material
Source: HighWire-hosted journal article supplement (https://bmjopen.bmj.com/content/11/9/e045942)
Supplement: inline-supplementary-material-1 [file inline-supplementary-material-1.pdf]

## Supplementary: Assessing treatment effects and publication bias across different specialties in medicine

Simon Schwab, Giuachin Kreiliger & Leonhard Held  
Center for Reproducible Science &  
Epidemiology, Biostatistics and Prevention Institute  
University of Zurich

August 5, 2021

- 
1. Primary study characteristics
    - a. What are the descriptives of the single studies per medical specialty? Data characteristics include effect sizes, their sample sizes, the publication years, the citations, and the journal rank.
    - b. What is the proportion of significant effects per specialty? Are the shapes of the distribution of the  $p$ -values similar across specialties?
    - c. Are the effect sizes (in terms of statistical significance) of the studies associated with medical specialty, sample size, journal rank, citations, or publication year?
  2. Combined effect estimates characteristics
    - a. What are the average combined effect estimates and variability per medical specialty?
    - b. What is the distribution of test statistics, and the proportion of significant combined effects reported per specialty? Are there differences between specialties?
    - c. Are the overall effect sizes (in terms of statistical significance) of the meta-analyses associated with specialty, sample size, in-field specific ranking of the journal, the number of citations, and the publication year?
  3. Estimation of publication bias
    - a. What is the evidence for publication bias as a function of sample size (i.e., number of studies per review) across specialties?
    - b. Is publication bias associated with specialty, sample size of studies, in-field specific ranking of the journals, number of citations of the studies, publication year of review, and number of studies included?
  4. Adjustment for publication bias
    - a. What is the effect of publication bias in terms of overall effect change (the effect after the adjustment compared to the effect before the adjustment)? Are there differences between specialties?
    - b. Is the change in the effect associated with specialty, total sample size, number of studies, in-field specific ranking of the journal, the number of citations, the year, or the number of studies?
- 

Table 1: Research questions and hypotheses. A registered study protocol is available at [osf.io/3a28k](https://osf.io/3a28k).

| Specialty                           | Cochrane review Groups                                                                                                               |                                                                         |
|-------------------------------------|--------------------------------------------------------------------------------------------------------------------------------------|-------------------------------------------------------------------------|
| 1 Anaesthesia & Pain (280)          | Anaesthesia (116)                                                                                                                    | Pain, Palliative and Supportive Care (164)                              |
| 2 Emergency & Trauma (288)          | Bone, Joint and Muscle Trauma (115)<br>Emergency and Critical Care (78)                                                              | Injuries (95)                                                           |
| 3 Gastroenterology (266)            | Colorectal (106)<br>Inflammatory Bowel Disease (86)                                                                                  | Upper GI and Pancreatic Diseases (74)                                   |
| 4 Genetics & Endocrinology (220)    | Cystic Fibrosis and Genetic Disorders (122)                                                                                          | Metabolic and Endocrine Disorders (98)                                  |
| 5 Gynaecology & Urology (416)       | Fertility Regulation (72)<br>Gynaecology and Fertility (207)                                                                         | Incontinence (79)<br>Urology (58)                                       |
| 6 Heart & Hypertension (354)        | Heart (160)<br>Hypertension (63)                                                                                                     | Vascular (131)                                                          |
| 7 Hepato-Biliary (177)              | Hepato-Biliary (177)                                                                                                                 |                                                                         |
| 8 Infectious Diseases (233)         | HIV/AIDS (73)<br>Infectious Diseases (139)                                                                                           | Sexually Transmitted Infections (21)                                    |
| 9 Kidney and Transplant (177)       | Kidney and Transplant (177)                                                                                                          |                                                                         |
| 10 Lungs (443)                      | Acute Respiratory Infections (132)                                                                                                   | Airways (311)                                                           |
| 11 Neonatal (328)                   | Neonatal (328)                                                                                                                       |                                                                         |
| 12 Neurology (421)                  | Epilepsy (68)<br>Movement Disorders (44)<br>Multiple Sclerosis and Rare Diseases of the CNS (42)                                     | Neuromuscular (88)<br>Stroke (179)                                      |
| 13 Oncology (313)                   | Breast Cancer (53)<br>Childhood Cancer (24)<br>Gynaecological, Neuro-oncology and Orphan Cancer (146)                                | Haematological Malignancies (65)<br>Lung Cancer (25)                    |
| 14 Oral Health, Eyes & ENT (325)    | ENT (73)<br>Eyes and Vision (127)                                                                                                    | Oral Health (125)                                                       |
| 15 Pregnancy and Childbirth (503)   | Pregnancy and Childbirth (503)                                                                                                       |                                                                         |
| 16 Psychiatry & Mental Health (723) | Common Mental Disorders (169)<br>Dementia and Cognitive Improvement (105)<br>Developmental, Psychosocial and Learning Problems (112) | Drugs and Alcohol (64)<br>Schizophrenia (208)<br>Tobacco Addiction (65) |
| 17 Public Health & Work (164)       | Consumers and Communication (46)<br>Effective Practice and Organisation of Care (58)                                                 | Public Health (21)<br>Work (39)                                         |
| 18 Skin & Wounds (212)              | Skin (83)                                                                                                                            | Wounds (129)                                                            |
| 19 Spine and Muscles (232)          | Back and Neck (55)                                                                                                                   | Musculoskeletal (177)                                                   |

Table 2: Assignment of the 53 Cochrane review groups into 19 medical specialties with the number of reviews in parenthesis. Assignment was based on thematic overlap, e.g. various cancer groups into “oncology”, various neurological conditions into “neurology”, etc. Very large groups (e.g., pregnancy & childbirth, and neonatal) were not further grouped.

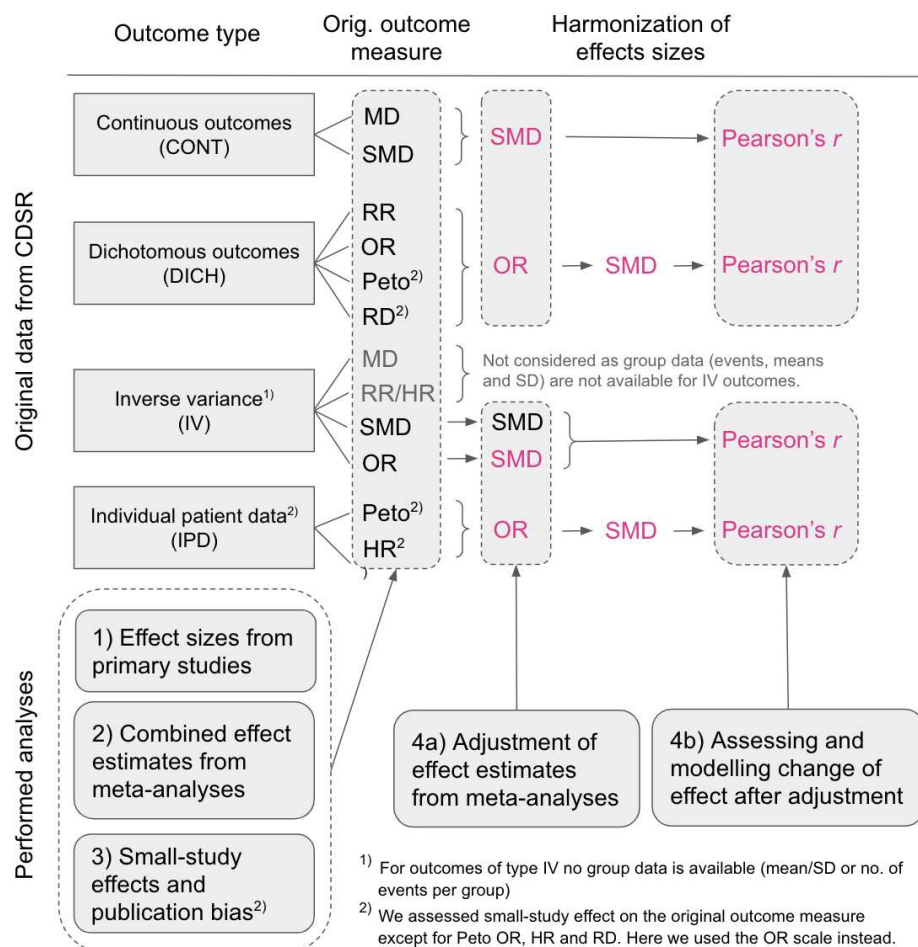

Figure 1: Harmonization of effect estimates from primary studies and meta-analyses and associated statistical analyses 1-4. Effect estimates on a different scale than reported in Cochrane Reviews are highlighted (magenta). Analyses 1-3 of the results section were based on the original effect measure used by the systematic reviewers. An exception was in the assessment of small-study effects: we used odds ratios (OR) instead of Peto odds ratios, hazard ratios (HR) and risk differences (RD). The bias-adjustment of the treatment effect estimates (4a) were based on standardized mean differences (SMD) or ORs for continuous and dichotomous outcomes, respectively. The extent of bias adjustment (4b) across all meta-analyses and specialties was assessed on the Pearson's *r* scale by converting the unadjusted and bias-adjusted effect estimate.

## 1 Effect sizes from primary studies

|                            | No. of primary studies | Median study size (IQR) | Median no. of outcomes (IRQ) | Median effect size r (IRQ) |
|----------------------------|------------------------|-------------------------|------------------------------|----------------------------|
| Psychiatry & Mental Health | 8091 (14.2%)           | 76 (40-193)             | 3 (1-5)                      | 0.15 (0.06-0.29)           |
| Pregnancy & Childbirth     | 5031 (8.8%)            | 109 (60-225)            | 4 (2-8)                      | 0.15 (0.06-0.30)           |
| Gynaecology & Urology      | 4736 (8.3%)            | 90 (49-180)             | 3 (2-5)                      | 0.18 (0.07-0.33)           |
| Anaesthesia & Pain         | 4686 (8.2%)            | 60 (40-107)             | 2 (1-5)                      | 0.23 (0.10-0.39)           |
| Heart & Hypertension       | 4250 (7.4%)            | 101 (50-236)            | 3 (2-5)                      | 0.18 (0.07-0.32)           |
| Lungs                      | 4177 (7.3%)            | 83 (37-235)             | 3 (2-5)                      | 0.15 (0.06-0.29)           |
| Gastroenterology           | 3464 (6.1%)            | 95 (50-200)             | 2 (1-4)                      | 0.19 (0.08-0.34)           |
| Emergency & Trauma         | 3281 (5.7%)            | 65 (39-138)             | 3 (1-5)                      | 0.18 (0.07-0.34)           |
| Neurology                  | 2661 (4.7%)            | 60 (30-132)             | 3 (1-5)                      | 0.17 (0.07-0.31)           |
| Oral Health, Eyes & ENT    | 2563 (4.5%)            | 60 (38-120)             | 2 (1-4)                      | 0.20 (0.08-0.37)           |
| Kidney & Transplant        | 2554 (4.5%)            | 60 (34-124)             | 4 (2-6)                      | 0.18 (0.07-0.32)           |
| Oncology                   | 2508 (4.4%)            | 123 (60-292)            | 3 (2-6)                      | 0.15 (0.06-0.30)           |
| Spine & Muscles            | 2457 (4.3%)            | 63 (37-120)             | 3 (2-6)                      | 0.16 (0.07-0.31)           |
| Skin & Wounds              | 2438 (4.3%)            | 73 (40-147)             | 2 (1-3)                      | 0.23 (0.10-0.42)           |
| Infectious Diseases        | 2212 (3.9%)            | 129 (61-357)            | 3 (1-5)                      | 0.15 (0.06-0.32)           |
| Public Health & Work       | 1986 (3.5%)            | 116 (54-279)            | 2 (1-3)                      | 0.13 (0.05-0.25)           |
| Hepato-Biliary             | 1976 (3.5%)            | 62 (35-110)             | 3 (1-4)                      | 0.20 (0.08-0.35)           |
| Genetics & Endocrinology   | 1749 (3.1%)            | 64 (32-151)             | 3 (2-6)                      | 0.16 (0.06-0.31)           |
| Neonatal                   | 1600 (2.8%)            | 60 (35-115)             | 4 (2-8)                      | 0.15 (0.06-0.30)           |
| Total                      | 62420 (100%)           |                         |                              |                            |
| Unique studies             | 57162 (92%)            | 91 (46-212)             | 3 (2-6)                      | 0.17 (0.07-0.32)           |

Table 3: Descriptives of efficacy outcomes of 57,162 primary studies for 19 medical specialties.

|                            | 1920-1929 | 1930-1939 | 1940-1949 | 1950-1959 | 1960-1969 | 1970-1979 | 1980-1989 | 1990-1999 | 2000-2009 | 2010-2019 | Year missing | Total | %     |
|----------------------------|-----------|-----------|-----------|-----------|-----------|-----------|-----------|-----------|-----------|-----------|--------------|-------|-------|
| Psychiatry & Mental Health | 4         | 0         | 0         | 25        | 131       | 395       | 889       | 1856      | 3215      | 1508      | 68           | 8091  | 13.0  |
| Pregnancy & Childbirth     | 1         | 2         | 2         | 26        | 109       | 256       | 704       | 1264      | 1612      | 1051      | 4            | 5031  | 8.1   |
| Gynaecology & Urology      | 0         | 0         | 0         | 1         | 30        | 109       | 411       | 1144      | 1952      | 1079      | 10           | 4736  | 7.6   |
| Anaesthesia & Pain         | 0         | 0         | 0         | 0         | 15        | 84        | 457       | 1405      | 1754      | 967       | 4            | 4686  | 7.5   |
| Heart & Hypertension       | 0         | 0         | 0         | 11        | 35        | 134       | 498       | 1142      | 1622      | 745       | 63           | 4250  | 6.8   |
| Lungs                      | 3         | 4         | 8         | 32        | 76        | 214       | 589       | 1228      | 1379      | 588       | 56           | 4177  | 6.7   |
| Gastroenterology           | 0         | 0         | 0         | 1         | 4         | 103       | 477       | 964       | 1337      | 570       | 8            | 3464  | 5.5   |
| Emergency & Trauma         | 0         | 0         | 0         | 2         | 11        | 73        | 341       | 1007      | 1275      | 572       | 0            | 3281  | 5.3   |
| Neurology                  | 0         | 0         | 0         | 3         | 16        | 52        | 245       | 560       | 1041      | 722       | 22           | 2661  | 4.3   |
| Oral Health, Eyes & ENT    | 0         | 0         | 0         | 7         | 66        | 84        | 258       | 526       | 997       | 613       | 12           | 2563  | 4.1   |
| Kidney & Transplant        | 0         | 0         | 0         | 0         | 3         | 54        | 247       | 715       | 1073      | 458       | 4            | 2554  | 4.1   |
| Oncology                   | 0         | 0         | 0         | 0         | 4         | 83        | 311       | 629       | 884       | 508       | 89           | 2508  | 4.0   |
| Spine & Muscles            | 0         | 0         | 0         | 3         | 15        | 60        | 249       | 615       | 1114      | 398       | 3            | 2457  | 3.9   |
| Skin & Wounds              | 0         | 0         | 0         | 0         | 9         | 80        | 296       | 691       | 879       | 481       | 2            | 2438  | 3.9   |
| Infectious Diseases        | 0         | 2         | 0         | 15        | 64        | 94        | 271       | 693       | 764       | 255       | 54           | 2212  | 3.5   |
| Public Health & Work       | 0         | 0         | 1         | 0         | 8         | 35        | 131       | 380       | 883       | 548       | 0            | 1986  | 3.2   |
| Hepato-Biliary             | 0         | 0         | 0         | 0         | 2         | 32        | 184       | 650       | 739       | 369       | 0            | 1976  | 3.2   |
| Genetics & Endocrinology   | 1         | 0         | 0         | 0         | 3         | 21        | 143       | 410       | 824       | 340       | 7            | 1749  | 2.8   |
| Neonatal                   | 0         | 0         | 0         | 7         | 16        | 51        | 235       | 472       | 483       | 336       | 0            | 1600  | 2.6   |
| Total                      | 9         | 8         | 11        | 133       | 617       | 2014      | 6936      | 16351     | 23827     | 12108     | 406          | 62420 | 100.0 |
| %                          | 0.0       | 0.0       | 0.0       | 0.2       | 1.0       | 3.2       | 11.1      | 26.2      | 38.2      | 19.4      | 0.7          | 100.0 |       |

Table 4: Number of primary studies by publication decade and specialty.

|                            | median number<br>of citations<br>(IQR) | median number<br>of citations per<br>year (IQR) | median SJR of<br>journal (IQR) |
|----------------------------|----------------------------------------|-------------------------------------------------|--------------------------------|
| Spine & Muscles            | 98 (43-198)                            | 5.92 (2.46-11.56)                               | 1.74 (1.02-2.77)               |
| Genetics & Endocrinology   | 88 (32-200)                            | 5.67 (2.00-13.33)                               | 2.13 (1.20-3.92)               |
| Public Health & Work       | 81 (38-158)                            | 5.73 (2.74-11.14)                               | 1.51 (0.98-2.77)               |
| Gastroenterology           | 78 (27-179)                            | 4.38 (1.48-11.14)                               | 2.14 (1.06-6.05)               |
| Emergency & Trauma         | 76 (31-174)                            | 4.50 (1.62-10.63)                               | 1.48 (0.89-3.21)               |
| Neurology                  | 76 (29-181)                            | 5.52 (1.90-11.88)                               | 1.69 (0.96-3.47)               |
| Oncology                   | 74 (27-182)                            | 4.16 (1.46-12.10)                               | 2.46 (1.27-6.07)               |
| Heart & Hypertension       | 67 (26-160)                            | 3.85 (1.50-9.29)                                | 1.76 (0.99-6.79)               |
| Psychiatry & Mental Health | 67 (24-157)                            | 4.27 (1.27-9.55)                                | 1.82 (0.99-2.78)               |
| Lungs                      | 63 (26-136)                            | 3.14 (1.17-7.52)                                | 2.54 (1.15-3.70)               |
| Hepato-Biliary             | 59 (19-136)                            | 3.22 (0.96-7.69)                                | 1.90 (1.05-5.10)               |
| Infectious Diseases        | 59 (23-118)                            | 3.07 (1.00-6.96)                                | 1.90 (1.18-3.26)               |
| Neonatal                   | 57 (24-116)                            | 3.04 (1.25-6.75)                                | 1.22 (1.01-3.00)               |
| Anaesthesia & Pain         | 54 (21-121)                            | 3.57 (1.40-7.96)                                | 1.24 (0.72-1.71)               |
| Oral Health, Eyes & ENT    | 53 (24-109)                            | 3.62 (1.30-7.30)                                | 1.22 (0.72-2.14)               |
| Skin & Wounds              | 46 (20-100)                            | 2.68 (0.97-6.19)                                | 1.16 (0.64-1.98)               |
| Kidney & Transplant        | 46 (17-116)                            | 2.76 (0.89-6.88)                                | 1.15 (0.52-2.48)               |
| Gynaecology & Urology      | 45 (16-100)                            | 3.05 (1.00-6.43)                                | 1.97 (0.86-2.57)               |
| Pregnancy & Childbirth     | 37 (13-84)                             | 2.20 (0.73-5.06)                                | 1.39 (0.76-2.69)               |

Table 5: Descriptives of publication metrics for primary studies, the number of citations and citations per year, and the SJR (SCImago Journal Rank) indicator.

| specialty                  | efficacy         | safety           |
|----------------------------|------------------|------------------|
| Skin & Wounds              | 0.36 (0.35-0.38) | 0.16 (0.14-0.18) |
| Anaesthesia & Pain         | 0.36 (0.36-0.37) | 0.19 (0.18-0.21) |
| Spine & Muscles            | 0.34 (0.33-0.35) | 0.17 (0.16-0.19) |
| Public Health & Work       | 0.34 (0.33-0.35) | 0.10 (0.06-0.14) |
| Genetics & Endocrinology   | 0.33 (0.32-0.34) | 0.14 (0.13-0.16) |
| Heart & Hypertension       | 0.33 (0.32-0.33) | 0.17 (0.15-0.20) |
| Oral Health, Eyes & ENT    | 0.32 (0.31-0.33) | 0.14 (0.12-0.18) |
| Infectious Diseases        | 0.30 (0.29-0.31) | 0.18 (0.17-0.20) |
| Lungs                      | 0.28 (0.28-0.29) | 0.12 (0.11-0.13) |
| Gynaecology & Urology      | 0.28 (0.28-0.29) | 0.23 (0.22-0.25) |
| Gastroenterology           | 0.28 (0.27-0.29) | 0.15 (0.13-0.16) |
| Psychiatry & Mental Health | 0.28 (0.27-0.28) | 0.20 (0.19-0.21) |
| Hepato-Biliary             | 0.27 (0.26-0.28) | 0.14 (0.12-0.16) |
| Oncology                   | 0.26 (0.26-0.27) | 0.29 (0.27-0.31) |
| Neurology                  | 0.26 (0.25-0.26) | 0.25 (0.23-0.27) |
| Emergency & Trauma         | 0.23 (0.23-0.24) | 0.08 (0.07-0.10) |
| Kidney & Transplant        | 0.23 (0.22-0.24) | 0.15 (0.13-0.17) |
| Pregnancy & Childbirth     | 0.20 (0.20-0.21) | 0.23 (0.20-0.26) |
| Neonatal                   | 0.18 (0.18-0.19) | 0.12 (0.07-0.19) |

Table 6: Proportion (and 95%-CI) of reported significant effects ( $p < 0.05$ ) in primary studies for efficacy and safety outcomes.

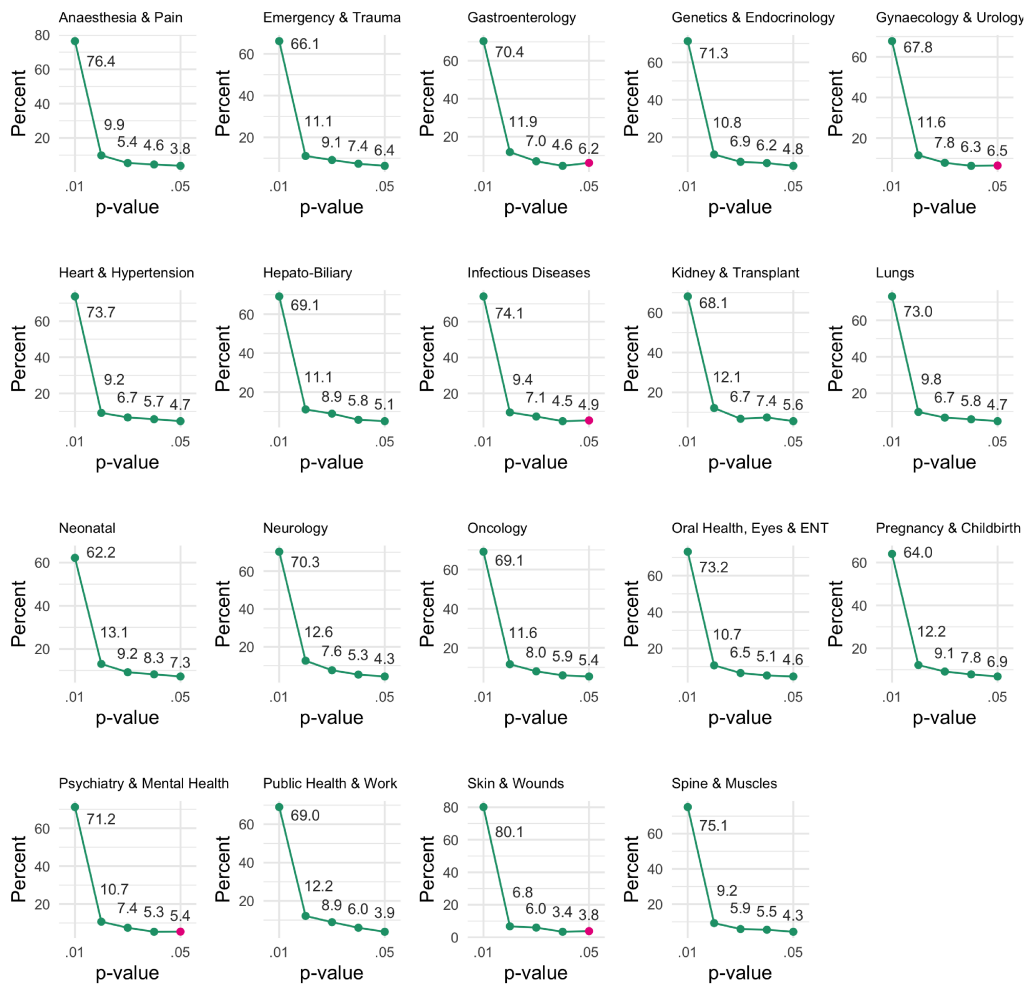

Figure 2: Percent of significant effects across specialties (p-curve). Five medical specialties showed a very small increase in the number of significant effects between  $.04 \leq p < .05$  (highlighted red).

|                                 | OR   | 95%-CI            | z-value | p-value  |
|---------------------------------|------|-------------------|---------|----------|
| Specialty: Anaesthesia & Pain   | 1.93 | from 1.79 to 2.08 | 17.10   | < 0.0001 |
| Skin & Wounds                   | 1.56 | from 1.40 to 1.75 | 7.86    | < 0.0001 |
| Public Health & Work            | 1.39 | from 1.24 to 1.56 | 5.78    | < 0.0001 |
| Oral Health, Eyes & ENT         | 1.34 | from 1.21 to 1.49 | 5.46    | < 0.0001 |
| Spine & Muscles                 | 1.33 | from 1.21 to 1.47 | 5.87    | < 0.0001 |
| Genetics & Endocrinology        | 1.33 | from 1.18 to 1.49 | 4.80    | < 0.0001 |
| Gynaecology & Urology           | 1.02 | from 0.94 to 1.10 | 0.44    | 0.66     |
| Infectious Diseases             | 1.01 | from 0.90 to 1.14 | 0.23    | 0.82     |
| Heart & Hypertension            | 0.97 | from 0.89 to 1.05 | -0.86   | 0.39     |
| Psychiatry & Mental Health      | 0.94 | from 0.88 to 0.99 | -2.17   | 0.03     |
| Emergency & Trauma              | 0.93 | from 0.85 to 1.02 | -1.62   | 0.11     |
| Lungs                           | 0.89 | from 0.82 to 0.96 | -2.84   | 0.005    |
| Gastroenterology                | 0.88 | from 0.80 to 0.96 | -2.71   | 0.007    |
| Neurology                       | 0.83 | from 0.76 to 0.92 | -3.53   | 0.0004   |
| Oncology                        | 0.78 | from 0.70 to 0.86 | -4.75   | < 0.0001 |
| Hepato-Biliary                  | 0.77 | from 0.69 to 0.87 | -4.41   | < 0.0001 |
| Kidney & Transplant             | 0.75 | from 0.68 to 0.83 | -5.80   | < 0.0001 |
| Neonatal                        | 0.63 | from 0.57 to 0.71 | -8.24   | < 0.0001 |
| Pregnancy & Childbirth          | 0.62 | from 0.58 to 0.67 | -13.65  | < 0.0001 |
| Journal ranking: SJR Q4         | 1.52 | from 1.32 to 1.75 | 5.82    | < 0.0001 |
| Q3                              | 1.41 | from 1.29 to 1.54 | 7.42    | < 0.0001 |
| Q2                              | 1.26 | from 1.18 to 1.34 | 7.27    | < 0.0001 |
| Study size (log2)               | 1.15 | from 1.14 to 1.17 | 23.29   | < 0.0001 |
| Citations per year (log2)       | 1.07 | from 1.06 to 1.08 | 10.97   | < 0.0001 |
| Publication year (per 10 years) | 0.94 | from 0.92 to 0.96 | -5.21   | < 0.0001 |
| Study is an RCT                 | 0.90 | from 0.86 to 0.94 | -5.02   | < 0.0001 |

Table 7: Regression analysis of variables associated with the statistical significance of a reported effect size in published primary studies.

## 2 Combined effect estimates from meta-analyses

|                            | Number of meta-analyses | Median sample size (IQR) | Median no. of studies (IRQ) | Median effect size r (IRQ) |
|----------------------------|-------------------------|--------------------------|-----------------------------|----------------------------|
| Psychiatry & Mental Health | 13906 (14.1%)           | 428 (187-984)            | 3 (2-6)                     | 0.13 (0.05-0.23)           |
| Pregnancy & Childbirth     | 11454 (11.6%)           | 903 (341-2546)           | 3 (2-6)                     | 0.09 (0.04-0.20)           |
| Lungs                      | 7071 (7.1%)             | 546 (192-1405)           | 3 (2-6)                     | 0.12 (0.05-0.22)           |
| Heart & Hypertension       | 6825 (6.9%)             | 1073 (367-4179)          | 4 (3-8)                     | 0.10 (0.04-0.22)           |
| Oncology                   | 6758 (6.8%)             | 696 (293-1740)           | 4 (2-7)                     | 0.11 (0.05-0.21)           |
| Gynaecology & Urology      | 5779 (5.8%)             | 466 (214-1136)           | 3 (2-5)                     | 0.13 (0.05-0.27)           |
| Neurology                  | 5586 (5.6%)             | 604 (207-1690)           | 3 (2-5)                     | 0.11 (0.05-0.22)           |
| Anaesthesia & Pain         | 4958 (5.0%)             | 463 (210-1073)           | 4 (2-7)                     | 0.18 (0.09-0.32)           |
| Neonatal                   | 4670 (4.7%)             | 348 (172-840)            | 3 (2-5)                     | 0.09 (0.04-0.20)           |
| Kidney & Transplant        | 4562 (4.6%)             | 331 (154-918)            | 3 (2-5)                     | 0.12 (0.05-0.24)           |
| Emergency & Trauma         | 4174 (4.2%)             | 465 (207-1156)           | 4 (2-7)                     | 0.12 (0.05-0.26)           |
| Spine & Muscles            | 4013 (4.1%)             | 407 (198-861)            | 3 (2-4)                     | 0.15 (0.07-0.28)           |
| Hepato-Biliary             | 3865 (3.9%)             | 360 (180-846)            | 4 (2-8)                     | 0.13 (0.06-0.25)           |
| Gastroenterology           | 3728 (3.8%)             | 506 (230-1346)           | 4 (2-7)                     | 0.14 (0.06-0.25)           |
| Genetics & Endocrinology   | 3098 (3.1%)             | 465 (200-1200)           | 3 (2-6)                     | 0.12 (0.05-0.23)           |
| Infectious Diseases        | 3067 (3.1%)             | 854 (331-2536)           | 3 (2-5)                     | 0.13 (0.05-0.27)           |
| Oral Health, Eyes & ENT    | 2328 (2.4%)             | 310 (144-682)            | 3 (2-5)                     | 0.16 (0.07-0.32)           |
| Public Health & Work       | 1620 (1.6%)             | 652 (272-1680)           | 3 (2-6)                     | 0.10 (0.04-0.18)           |
| Skin & Wounds              | 1504 (1.5%)             | 419 (180-1022)           | 3 (2-5)                     | 0.20 (0.08-0.37)           |
| ACROSS ALL SPECIALTIES     | 98966 (100%)            | 523 (220-1395)           | 3 (2-6)                     | 0.12 (0.05-0.24)           |

Table 8: Descriptives of reported combined effect sizes from meta-analyses.



| specialty                  | combined effect  |
|----------------------------|------------------|
| Anaesthesia & Pain         | 0.49 (0.47-0.50) |
| Spine & Muscles            | 0.43 (0.42-0.45) |
| Skin & Wounds              | 0.41 (0.39-0.44) |
| Genetics & Endocrinology   | 0.40 (0.39-0.42) |
| Infectious Diseases        | 0.39 (0.37-0.41) |
| Heart & Hypertension       | 0.38 (0.37-0.39) |
| Lungs                      | 0.37 (0.36-0.38) |
| Oral Health, Eyes & ENT    | 0.36 (0.34-0.37) |
| Gynaecology & Urology      | 0.34 (0.33-0.36) |
| Gastroenterology           | 0.34 (0.33-0.36) |
| Psychiatry & Mental Health | 0.34 (0.33-0.35) |
| Neurology                  | 0.34 (0.32-0.35) |
| Public Health & Work       | 0.33 (0.31-0.36) |
| Oncology                   | 0.32 (0.31-0.33) |
| Emergency & Trauma         | 0.30 (0.29-0.31) |
| Hepato-Biliary             | 0.29 (0.28-0.30) |
| Kidney & Transplant        | 0.29 (0.27-0.30) |
| Pregnancy & Childbirth     | 0.24 (0.23-0.25) |
| Neonatal                   | 0.21 (0.20-0.22) |

Table 9: Proportion (and 95%-CI) of statistically significant combined effect estimates ( $p < 0.05$ ) across medical specialties.

|                                  | OR   | 95%-CI            | z-value | p-value  |
|----------------------------------|------|-------------------|---------|----------|
| Specialty: Anaesthesia & Pain    | 2.46 | from 1.97 to 3.06 | 8.00    | < 0.0001 |
| Spine & Muscles                  | 1.52 | from 1.18 to 1.97 | 3.19    | 0.001    |
| Genetics & Endocrinology         | 1.47 | from 1.10 to 1.95 | 2.60    | 0.009    |
| Skin & Wounds                    | 1.38 | from 1.02 to 1.88 | 2.06    | 0.039    |
| Oral Health, Eyes & ENT          | 1.32 | from 1.03 to 1.70 | 2.18    | 0.03     |
| Gynaecology & Urology            | 1.19 | from 0.97 to 1.44 | 1.70    | 0.089    |
| Lungs                            | 1.08 | from 0.89 to 1.30 | 0.78    | 0.44     |
| Infectious Diseases              | 1.03 | from 0.79 to 1.34 | 0.22    | 0.83     |
| Gastroenterology                 | 1.02 | from 0.81 to 1.29 | 0.20    | 0.84     |
| Psychiatry & Mental Health       | 0.98 | from 0.84 to 1.15 | -0.22   | 0.82     |
| Public Health & Work             | 0.96 | from 0.69 to 1.33 | -0.26   | 0.79     |
| Neurology                        | 0.90 | from 0.73 to 1.11 | -1.03   | 0.31     |
| Heart & Hypertension             | 0.86 | from 0.70 to 1.05 | -1.48   | 0.14     |
| Kidney & Transplant              | 0.80 | from 0.61 to 1.05 | -1.63   | 0.10     |
| Hepato-Biliary                   | 0.78 | from 0.60 to 1.02 | -1.85   | 0.065    |
| Oncology                         | 0.77 | from 0.60 to 0.98 | -2.17   | 0.03     |
| Emergency & Trauma               | 0.66 | from 0.53 to 0.84 | -3.46   | 0.0005   |
| Neonatal                         | 0.57 | from 0.46 to 0.72 | -4.69   | < 0.0001 |
| Pregnancy & Childbirth           | 0.57 | from 0.47 to 0.68 | -6.16   | < 0.0001 |
| Median SJR (log2)                | 1.01 | from 0.99 to 1.03 | 0.67    | 0.51     |
| Sample size (log2)               | 1.08 | from 1.07 to 1.10 | 9.12    | < 0.0001 |
| Median citations per year (log2) | 1.04 | from 1.02 to 1.06 | 4.55    | < 0.0001 |
| Review year (per 10 years)       | 0.94 | from 0.84 to 1.06 | -0.98   | 0.33     |
| Number of studies                | 1.60 | from 1.56 to 1.65 | 32.47   | < 0.0001 |

Table 10: Regression analysis of variables associated with the statistical significance of a combined effect estimate from a meta-analysis.

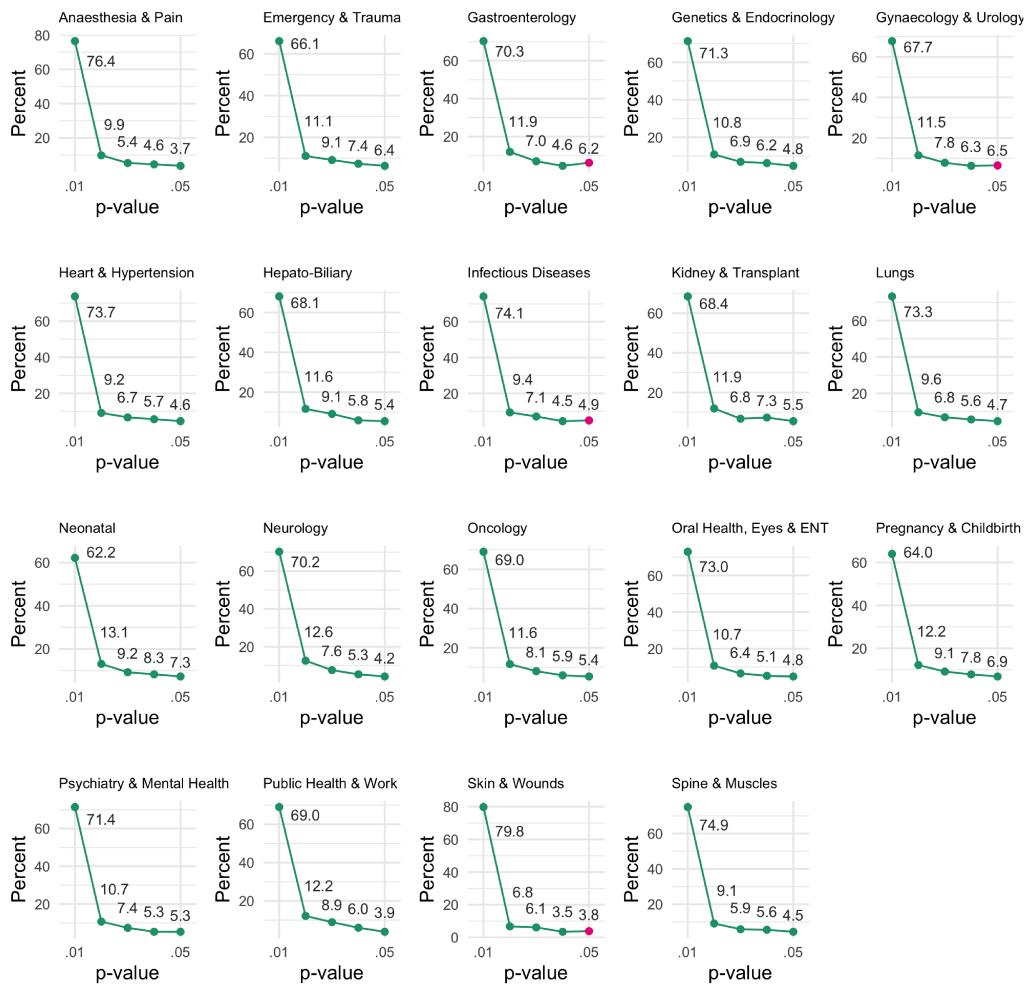

Figure 3: Percent of statistically significant combined effect estimates from meta-analyses across medical specialties (p-curve). Four medical specialties showed a very small increase in the number of significant effects between  $.04 \leq p < .05$  (highlighted red).

### 3 Funnel plot asymmetry and publication bias

|                                  | estimate | 95%-CI                | t-value | p-value  |
|----------------------------------|----------|-----------------------|---------|----------|
| Specialty: Infectious Diseases   | 0.338    | from 0.016 to 0.659   | 2.06    | 0.04     |
| Anaesthesia & Pain               | 0.299    | from 0.118 to 0.480   | 3.24    | 0.001    |
| Oral Health, Eyes & ENT          | 0.127    | from -0.253 to 0.506  | 0.65    | 0.51     |
| Kidney & Transplant              | 0.112    | from -0.129 to 0.353  | 0.91    | 0.36     |
| Neonatal                         | 0.067    | from -0.232 to 0.366  | 0.44    | 0.66     |
| Gynaecology & Urology            | 0.065    | from -0.147 to 0.276  | 0.60    | 0.55     |
| Spine & Muscles                  | 0.054    | from -0.252 to 0.361  | 0.35    | 0.73     |
| Pregnancy & Childbirth           | 0.022    | from -0.157 to 0.201  | 0.24    | 0.81     |
| Heart & Hypertension             | 0.002    | from -0.161 to 0.165  | 0.02    | 0.98     |
| Neurology                        | -0.002   | from -0.201 to 0.196  | -0.02   | 0.98     |
| Hepato-Biliary                   | -0.037   | from -0.252 to 0.178  | -0.34   | 0.73     |
| Gastroenterology                 | -0.063   | from -0.285 to 0.159  | -0.56   | 0.58     |
| Psychiatry & Mental Health       | -0.063   | from -0.200 to 0.073  | -0.91   | 0.36     |
| Oncology                         | -0.121   | from -0.329 to 0.086  | -1.15   | 0.25     |
| Skin & Wounds                    | -0.160   | from -0.525 to 0.206  | -0.86   | 0.39     |
| Genetics & Endocrinology         | -0.161   | from -0.498 to 0.176  | -0.94   | 0.35     |
| Lungs                            | -0.191   | from -0.371 to -0.011 | -2.08   | 0.037    |
| Public Health & Work             | -0.216   | from -0.550 to 0.117  | -1.27   | 0.20     |
| Median SJR (log2)                | -0.012   | from -0.051 to 0.028  | -0.58   | 0.56     |
| Sample size (log2)               | -0.038   | from -0.066 to -0.010 | -2.66   | 0.008    |
| Median citations per year (log2) | -0.013   | from -0.040 to 0.015  | -0.88   | 0.38     |
| Review year (per 10 years)       | 0.027    | from -0.088 to 0.142  | 0.46    | 0.64     |
| No. of studies (log2)            | 0.274    | from 0.220 to 0.328   | 9.98    | < 0.0001 |

Table 11: Regression analysis of variables associated with the t-score from adjustment by regression. In the medical specialties, Emergency and Trauma is closest to the mean estimate across all specialties and severs as baseline level.

|                                  | OR   | 95%-CI            | z-value | p-value  |
|----------------------------------|------|-------------------|---------|----------|
| Specialty: Infectious Diseases   | 3.00 | from 1.26 to 7.16 | 2.49    | 0.013    |
| Anaesthesia & Pain               | 1.52 | from 0.92 to 2.53 | 1.63    | 0.10     |
| Oral Health, Eyes & ENT          | 1.45 | from 0.49 to 4.31 | 0.67    | 0.50     |
| Skin & Wounds                    | 1.14 | from 0.39 to 3.31 | 0.24    | 0.81     |
| Kidney & Transplant              | 1.13 | from 0.57 to 2.25 | 0.35    | 0.72     |
| Neonatal                         | 1.12 | from 0.47 to 2.67 | 0.26    | 0.80     |
| Emergency & Trauma               | 1.09 | from 0.62 to 1.90 | 0.30    | 0.77     |
| Gynaecology & Urology            | 1.04 | from 0.55 to 1.95 | 0.11    | 0.91     |
| Heart & Hypertension             | 1.03 | from 0.64 to 1.66 | 0.13    | 0.90     |
| Pregnancy & Childbirth           | 0.99 | from 0.59 to 1.67 | -0.04   | 0.97     |
| Gastroenterology                 | 0.91 | from 0.47 to 1.74 | -0.29   | 0.78     |
| Psychiatry & Mental Health       | 0.89 | from 0.60 to 1.34 | -0.55   | 0.59     |
| Hepato-Biliary                   | 0.83 | from 0.44 to 1.55 | -0.59   | 0.55     |
| Spine & Muscles                  | 0.80 | from 0.31 to 2.06 | -0.47   | 0.64     |
| Neurology                        | 0.78 | from 0.43 to 1.43 | -0.80   | 0.43     |
| Genetics & Endocrinology         | 0.75 | from 0.27 to 2.08 | -0.55   | 0.58     |
| Public Health & Work             | 0.70 | from 0.24 to 2.07 | -0.64   | 0.52     |
| Oncology                         | 0.65 | from 0.34 to 1.23 | -1.32   | 0.19     |
| Lungs                            | 0.63 | from 0.35 to 1.12 | -1.58   | 0.11     |
| Median SJR (log2)                | 0.96 | from 0.85 to 1.09 | -0.61   | 0.54     |
| Sample size (log2)               | 0.92 | from 0.84 to 1.01 | -1.80   | 0.072    |
| Median citations per year (log2) | 0.97 | from 0.88 to 1.06 | -0.77   | 0.44     |
| Review year (per 10 years)       | 1.13 | from 0.80 to 1.59 | 0.69    | 0.49     |
| No. of studies (log2)            | 2.23 | from 1.89 to 2.63 | 9.48    | < 0.0001 |

Table 12: Regression analysis of variables associated with funnel plot asymmetry (yes/no) in a meta-analysis.

## 4 Adjustment of effect estimates from meta-analyses

|                                     | estimate | 95%-CI                | t-value | p-value  |
|-------------------------------------|----------|-----------------------|---------|----------|
| Specialty: Genetics & Endocrinology | 0.023    | from -0.013 to 0.060  | 1.24    | 0.21     |
| Kidney & Transplant                 | 0.021    | from -0.006 to 0.047  | 1.54    | 0.12     |
| Oncology                            | 0.020    | from -0.002 to 0.043  | 1.75    | 0.079    |
| Public Health & Work                | 0.019    | from -0.017 to 0.055  | 1.04    | 0.30     |
| Pregnancy & Childbirth              | 0.015    | from -0.005 to 0.034  | 1.47    | 0.14     |
| Neonatal                            | 0.007    | from -0.026 to 0.039  | 0.42    | 0.68     |
| Neurology                           | 0.006    | from -0.016 to 0.027  | 0.54    | 0.59     |
| Oral Health, Eyes & ENT             | 0.002    | from -0.039 to 0.042  | 0.09    | 0.93     |
| Gynaecology & Urology               | 0.000    | from -0.022 to 0.023  | 0.04    | 0.97     |
| Psychiatry & Mental Health          | 0.000    | from -0.015 to 0.015  | 0.02    | 0.98     |
| Emergency & Trauma                  | 0.000    | from -0.021 to 0.021  | 0.02    | 0.99     |
| Spine & Muscles                     | -0.000   | from -0.033 to 0.033  | -0.02   | 0.99     |
| Lungs                               | -0.003   | from -0.022 to 0.017  | -0.30   | 0.77     |
| Heart & Hypertension                | -0.006   | from -0.023 to 0.012  | -0.62   | 0.53     |
| Gastroenterology                    | -0.007   | from -0.031 to 0.017  | -0.59   | 0.56     |
| Anaesthesia & Pain                  | -0.021   | from -0.040 to -0.001 | -2.07   | 0.039    |
| Skin & Wounds                       | -0.027   | from -0.066 to 0.012  | -1.35   | 0.18     |
| Infectious Diseases                 | -0.049   | from -0.084 to -0.015 | -2.80   | 0.005    |
| Median SJR (log2)                   | 0.002    | from -0.003 to 0.006  | 0.75    | 0.46     |
| Sample size (log2)                  | 0.011    | from 0.009 to 0.014   | 7.65    | < 0.0001 |
| Med. citations per year (log2)      | -0.000   | from -0.003 to 0.003  | -0.06   | 0.95     |
| Review year (per 10 years)          | 0.000    | from -0.012 to 0.013  | 0.04    | 0.97     |
| No. of studies (log2)               | -0.008   | from -0.013 to -0.002 | -2.76   | 0.006    |

Table 13: Regression analysis of variables associated with the change of effect estimates after adjustment by regression. In the medical specialties, Hepato-Biliary is closest to the mean estimate across all specialties and serves as baseline level.

|                                | estimate | 95%-CI                | t-value | p-value |
|--------------------------------|----------|-----------------------|---------|---------|
| Specialty: Kidney & Transplant | 0.008    | from 0.000 to 0.016   | 1.96    | 0.05    |
| Genetics & Endocrinology       | 0.007    | from -0.005 to 0.018  | 1.17    | 0.24    |
| Skin & Wounds                  | 0.006    | from -0.006 to 0.018  | 0.99    | 0.32    |
| Oncology                       | 0.004    | from -0.003 to 0.011  | 1.10    | 0.27    |
| Public Health & Work           | 0.004    | from -0.007 to 0.015  | 0.67    | 0.50    |
| Neurology                      | 0.003    | from -0.003 to 0.010  | 0.96    | 0.33    |
| Hepato-Biliary                 | 0.003    | from -0.005 to 0.010  | 0.69    | 0.49    |
| Pregnancy & Childbirth         | 0.002    | from -0.004 to 0.008  | 0.66    | 0.51    |
| Heart & Hypertension           | 0.002    | from -0.004 to 0.007  | 0.66    | 0.51    |
| Psychiatry & Mental Health     | 0.001    | from -0.004 to 0.006  | 0.43    | 0.67    |
| Emergency & Trauma             | -0.000   | from -0.007 to 0.006  | -0.05   | 0.96    |
| Spine & Muscles                | -0.002   | from -0.013 to 0.009  | -0.30   | 0.77    |
| Gastroenterology               | -0.002   | from -0.010 to 0.005  | -0.58   | 0.56    |
| Neonatal                       | -0.002   | from -0.013 to 0.008  | -0.46   | 0.64    |
| Gynaecology & Urology          | -0.004   | from -0.011 to 0.004  | -0.98   | 0.33    |
| Oral Health, Eyes & ENT        | -0.004   | from -0.017 to 0.008  | -0.66   | 0.51    |
| Anaesthesia & Pain             | -0.010   | from -0.016 to -0.003 | -3.07   | 0.002   |
| Infectious Diseases            | -0.016   | from -0.027 to -0.006 | -2.99   | 0.003   |
| Median SJR (log2)              | 0.002    | from 0.000 to 0.003   | 2.38    | 0.017   |
| Sample size (log2)             | 0.001    | from 0.000 to 0.002   | 2.14    | 0.032   |
| Med. citations per year (log2) | -0.000   | from -0.001 to 0.000  | -0.91   | 0.36    |
| Review year (per 10 years)     | 0.002    | from -0.002 to 0.006  | 1.05    | 0.29    |
| No. of studies (log2)          | -0.002   | from -0.003 to 0.000  | -1.73   | 0.083   |

Table 14: Regression analysis of variables associated with change of the effect estimates after adjustment by Copas selection model. In the medical specialties, Lungs is closest to the mean estimate across all specialties and serves as baseline level.
